# Supplementary material for: Prevalence of Posttraumatic Stress Disorder in Prisoners
Source: PubMed Central journal article supplement (PMC5982805; doi:10.1093/epirev/mxx015), 2018-03-27
Supplement: mxx015mundtwebmaterialfinal.pdf [file mxx015mundtwebmaterialfinal.pdf]

## **Web Material**

Web Appendix 1. Quality Appraisal Scale

Web Table 1. Quality Scoring of Included Samples, 1980-2017

Web Table 2. Extracted Information of Included Samples, 1980-2017

Web Table 3. Sensitivity Analyses

Web Figure 1. Funnel Plots of Point Prevalence Estimates Against Standard Errors (for male and female samples), 1980-2017

Web Figure 2. Funnel Plots of One-year Prevalence Estimates Against Standard Errors (for male and female samples), 1980-2017

Web Figure 3. Funnel Plots of Lifetime Prevalence Estimates Against Standard Errors (for male and female samples), 1980-2017

## **Web Appendix 1. Quality Appraisal Scale\***

### (1) Representativeness of the sample:

1 point: Stratified random, random, population or systematic sampling.

0 point: Convenience sampling.

### (2) Sample size:

1 point: Sample size equal to or greater than 100 participants.

0 point: Sample size less than 100 participants.

### (3) Participation:

#### a. Reporting of participation rate or non-response analysis

1 point: Yes

0 point: No

#### b. Satisfactory rate of participation (if refusal rate not reported, non-response rate used)

1 point: Participation rate was equal or higher than 80%

0 point: Participation rate was lower than 80%, or not reported

### (4) Validity of PTSD diagnosis:

1 point: Psychiatrist(s)/psychologist(s) made the PTSD diagnoses

0 point: Trained interviewer(s) made the PTSD diagnoses

### (5) Quality of descriptive statistics:

1 point: Reporting of the descriptive statistics to describe the sample included age AND at least one other socio-demographic or criminal characteristic.

0 point: Descriptive statistics were not reported or were incomplete.

### Scoring:

1-2 Low

3-4 Medium

5-6 High

\*based on a modified version of the Newcastle-Ottawa Scale (22, 23)

**Web Table 1.** Quality Scoring of the Included Samples, 1980-2017

| <b>First Author, Year<br/>(Reference No.)</b> | <b>Representativeness</b> | <b>Sample size</b> | <b>Reporting of participation rate</b> | <b>Satisfactory rate of participation</b> | <b>Validity of diagnostic</b> | <b>Quality of statistics</b> | <b>Total score</b> | <b>Quality group</b> |
|-----------------------------------------------|---------------------------|--------------------|----------------------------------------|-------------------------------------------|-------------------------------|------------------------------|--------------------|----------------------|
| Andreoli, 2014 (57) M, sentenced              | 1                         | 1                  | 1                                      | 1                                         | 0                             | 1                            | 5                  | High                 |
| Andreoli, 2014 (57) F, sentenced              | 1                         | 1                  | 1                                      | 1                                         | 0                             | 1                            | 5                  | High                 |
| Andreoli, 2014 (57) M remand                  | 1                         | 1                  | 1                                      | 1                                         | 0                             | 1                            | 5                  | High                 |
| Assadi, 2006 (60)                             | 1                         | 1                  | 1                                      | 1                                         | 1                             | 1                            | 6                  | High                 |
| Beaudette, 2016 (31)                          | 1                         | 1                  | 1                                      | 0                                         | 0                             | 1                            | 4                  | Medium               |
| Bebbington, 2017 (48) M                       | 1                         | 1                  | 1                                      | 0                                         | 1                             | 1                            | 5                  | High                 |
| Bebbington, 2017 (48) F                       | 1                         | 1                  | 1                                      | 0                                         | 1                             | 1                            | 5                  | High                 |
| Boşgelmez, 2010 (61) M                        | 1                         | 0                  | 1                                      | 1                                         | 1                             | 1                            | 5                  | High                 |
| Boşgelmez, 2010 (61) F                        | 1                         | 0                  | 1                                      | 1                                         | 1                             | 1                            | 5                  | High                 |
| Brink, 2001 (32)                              | 1                         | 1                  | 1                                      | 1                                         | 1                             | 1                            | 6                  | High                 |
| Brooke, 1996 (49)                             | 1                         | 1                  | 1                                      | 1                                         | 1                             | 0                            | 5                  | High                 |
| Bulten, 2009 (43)                             | 1                         | 1                  | 1                                      | 1                                         | 1                             | 1                            | 6                  | High                 |
| Butler, 2003 (28) M, mixed                    | 0                         | 1                  | 1                                      | 0                                         | 0                             | 1                            | 3                  | Medium               |
| Butler, 2003 (28) M, sentenced                | 1                         | 1                  | 1                                      | 1                                         | 0                             | 1                            | 5                  | High                 |
| Butler, 2003 (28) F, mixed                    | 0                         | 1                  | 1                                      | 0                                         | 0                             | 1                            | 3                  | Medium               |
| Butler, 2003 (28) F, sentenced                | 1                         | 1                  | 1                                      | 1                                         | 0                             | 1                            | 5                  | High                 |

| <b>First Author, Year<br/>(Reference No.)</b> | <b>Representativeness</b> | <b>Sample size</b> | <b>Reporting of participation rate</b> | <b>Satisfactory rate of participation</b> | <b>Validity of diagnostic</b> | <b>Quality of statistics</b> | <b>Total score</b> | <b>Quality group</b> |
|-----------------------------------------------|---------------------------|--------------------|----------------------------------------|-------------------------------------------|-------------------------------|------------------------------|--------------------|----------------------|
| Derkzen, 2016 (34)                            | 1                         | 1                  | 0                                      | 0                                         | 1                             | 1                            | 4                  | Medium               |
| Duburcq, 2004 (36) M                          | 1                         | 1                  | 1                                      | 0                                         | 1                             | 1                            | 5                  | High                 |
| Duburcq, 2004 (36) M, MQ                      | 1                         | 1                  | 1                                      | 0                                         | 1                             | 1                            | 5                  | High                 |
| Duburcq, 2004 (36) F                          | 1                         | 0                  | 1                                      | 0                                         | 1                             | 1                            | 4                  | Medium               |
| Dudeck, 2009 (37)                             | 1                         | 1                  | 1                                      | 1                                         | 1                             | 1                            | 6                  | High                 |
| Einarsson, 2009 (41)                          | 1                         | 0                  | 1                                      | 1                                         | 1                             | 1                            | 5                  | High                 |
| Gunter, 2008 (50) M                           | 1                         | 1                  | 1                                      | 1                                         | 0                             | 1                            | 5                  | High                 |
| Gunter, 2008 (50) F                           | 1                         | 0                  | 1                                      | 1                                         | 0                             | 1                            | 4                  | Medium               |
| Guthrie, 1998 (51)                            | 1                         | 1                  | 1                                      | 0                                         | 1                             | 1                            | 5                  | High                 |
| Hodgins, 1990 (33)                            | 1                         | 1                  | 1                                      | 0                                         | 0                             | 1                            | 4                  | Medium               |
| Huang, 2006 (59)                              | 1                         | 1                  | 1                                      | 1                                         | 1                             | 1                            | 6                  | High                 |
| Lynch, 2014 (52) sentenced                    | 1                         | 1                  | 1                                      | 0                                         | 0                             | 1                            | 4                  | Medium               |
| Lynch, 2014 (52) remand                       | 1                         | 1                  | 1                                      | 0                                         | 0                             | 1                            | 4                  | Medium               |
| Math, 2011 (21) sentenced                     | 1                         | 1                  | 0                                      | 0                                         | 0                             | 1                            | 3                  | Medium               |
| Math, 2011 (21) remand                        | 1                         | 1                  | 0                                      | 0                                         | 0                             | 1                            | 3                  | Medium               |
| Mir, 2015 (40)                                | 1                         | 1                  | 1                                      | 0                                         | 1                             | 1                            | 5                  | High                 |
| Missoni, 2003 (38)                            | 1                         | 1                  | 1                                      | 1                                         | 1                             | 1                            | 6                  | High                 |
| Mohan, 1997 (42)                              | 1                         | 0                  | 1                                      | 1                                         | 1                             | 1                            | 5                  | High                 |

| <b>First Author, Year<br/>(Reference No.)</b> | <b>Representativeness</b> | <b>Sample size</b> | <b>Reporting of participation rate</b> | <b>Satisfactory rate of participation</b> | <b>Validity of diagnostic</b> | <b>Quality of statistics</b> | <b>Total score</b> | <b>Quality group</b> |
|-----------------------------------------------|---------------------------|--------------------|----------------------------------------|-------------------------------------------|-------------------------------|------------------------------|--------------------|----------------------|
| Mundt, 2013 (58) M                            | 1                         | 1                  | 1                                      | 1                                         | 0                             | 1                            | 5                  | High                 |
| Mundt, 2013 (58) F                            | 1                         | 1                  | 1                                      | 1                                         | 0                             | 1                            | 5                  | High                 |
| Mundt, 2016 (35) M                            | 1                         | 1                  | 1                                      | 1                                         | 1                             | 1                            | 6                  | High                 |
| Mundt, 2016 (35) F                            | 1                         | 1                  | 1                                      | 1                                         | 1                             | 1                            | 6                  | High                 |
| Naidoo, 2012 (20) sentenced                   | 1                         | 1                  | 1                                      | 0                                         | 1                             | 1                            | 5                  | High                 |
| Naidoo, 2012 (20) remand                      | 1                         | 0                  | 1                                      | 0                                         | 1                             | 1                            | 4                  | Medium               |
| Powell, 1997 (53) sentenced                   | 1                         | 1                  | 1                                      | 0                                         | 0                             | 1                            | 4                  | Medium               |
| Powell, 1997 (53) remand                      | 1                         | 0                  | 1                                      | 0                                         | 0                             | 1                            | 3                  | Medium               |
| Simpson, 1999 (44) M, sentenced               | 1                         | 1                  | 1                                      | 0                                         | 0                             | 1                            | 4                  | Medium               |
| Simpson, 1999 (44) M, remand                  | 1                         | 1                  | 1                                      | 1                                         | 0                             | 1                            | 5                  | High                 |
| Simpson, 1999 (44) F, sentenced               | 1                         | 1                  | 1                                      | 1                                         | 0                             | 1                            | 5                  | High                 |
| Stompe, 2010 (30) sentenced                   | 1                         | 1                  | 0                                      | 0                                         | 0                             | 0                            | 2                  | Low                  |
| Stompe, 2010 (30) remand                      | 1                         | 1                  | 0                                      | 0                                         | 0                             | 0                            | 2                  | Low                  |
| Teplin, 1996 (54)                             | 1                         | 1                  | 1                                      | 1                                         | 0                             | 1                            | 5                  | High                 |
| Trestman, 2007 (55) M                         | 1                         | 1                  | 1                                      | 1                                         | 0                             | 1                            | 5                  | High                 |
| Trestman, 2007 (55) F                         | 1                         | 1                  | 1                                      | 1                                         | 0                             | 1                            | 5                  | High                 |
| Tye, 2006 (29)                                | 1                         | 1                  | 1                                      | 0                                         | 0                             | 1                            | 4                  | Medium               |
| Urbaniok, 2007 (47)                           | 1                         | 0                  | 1                                      | 1                                         | 1                             | 0                            | 4                  | Medium               |

| <b>First Author, Year<br/>(Reference No.)</b> | <b>Representativeness</b> | <b>Sample size</b> | <b>Reporting of participation rate</b> | <b>Satisfactory rate of participation</b> | <b>Validity of diagnostic</b> | <b>Quality of statistics</b> | <b>Total score</b> | <b>Quality group</b> |
|-----------------------------------------------|---------------------------|--------------------|----------------------------------------|-------------------------------------------|-------------------------------|------------------------------|--------------------|----------------------|
| Vicens, 2011 (46)                             | 1                         | 1                  | 1                                      | 1                                         | 1                             | 1                            | 6                  | High                 |
| von Schönfeld, 2006 (39)                      | 1                         | 0                  | 1                                      | 0                                         | 1                             | 1                            | 4                  | Medium               |
| Zabala-Baños, 2016 (45)                       | 1                         | 1                  | 1                                      | 1                                         | 1                             | 1                            | 6                  | High                 |
| Zlotnick, 1997 (56)                           | 1                         | 0                  | 1                                      | 0                                         | 0                             | 1                            | 3                  | Medium               |

Abbreviations: F, female; M, male; MQ, Martinique

**Web Table 2.** Data Extracted from the Included Samples, 1980-2017

| First Author, Year<br>(Reference, No.) | Final year<br>of data<br>collection | Sample<br>size | Refusal<br>Rate<br>(%) <sup>b</sup> | Mean<br>Age<br>(years) | Number of PTSD Cases |          |          |
|----------------------------------------|-------------------------------------|----------------|-------------------------------------|------------------------|----------------------|----------|----------|
|                                        |                                     |                |                                     |                        | Point                | One-year | Lifetime |
| Andreoli, 2014 (57) M,<br>sentenced    | 2007                                | 676            |                                     | 32.2                   | 37                   | 53       | 178      |
| Andreoli, 2014 (57) F,<br>sentenced    | 2007                                | 617            | 5.8                                 | 32.1                   | 89                   | 99       | 248      |
| Andreoli, 2014 (57) M remand           | 2007                                | 516            |                                     | 27.8                   | 41                   | 57       | 172      |
| Assadi, 2006 (60)                      | 2003                                | 351            | 12.2                                | 32.7                   | 2                    |          |          |
| Beaudette, 2016 (31)                   | 2014                                | 1110           | 22.0                                | 35.6                   | 122                  |          | 149      |
| Bebbington, 2017 (48) M                | 2009                                | 197            | 22.9                                | 34.6                   | 9                    |          |          |
| Bebbington, 2017 (48) F                | 2009                                | 171            | 22.8                                | 31.8                   | 20                   |          |          |
| Boşgelmez, 2010 (61) M                 | 2005                                | 30             | 6.3                                 | 30.1                   | 2                    |          |          |
| Boşgelmez, 2010 (61) F                 | 2005                                | 30             | 11.8                                | 31.1                   | 3                    |          |          |
| Brink, 2001 (32)                       | 1999                                | 202            | 1.5                                 | 33.0                   | 8                    |          | 10       |
| Brooke, 1996 (49)                      | 1993 <sup>a</sup>                   | 750            | 18.0                                | 27.5                   | 13                   |          |          |
| Bulten, 2009 (43)                      | 2006 <sup>a</sup>                   | 191            | 18.7                                | 30.4                   | 9                    |          |          |
| Butler, 2003 (28) M, mixed             | 2001                                | 756            |                                     | 29.6                   | 128                  | 164      |          |
| Butler, 2003 (28) M,<br>sentenced      | 2001                                | 458            | 15.0                                | 33.8                   | 43                   | 73       |          |
| Butler, 2003 (28) F, mixed             | 2001                                | 165            |                                     | 29.1                   | 62                   | 72       |          |
| Butler, 2003 (28) F, sentenced         | 2001                                | 108            | 16.0                                | 32.7                   | 30                   | 46       |          |
| Derkzen, 2016 (34)                     | 2016                                | 154            |                                     | 36.0                   | 51                   |          | 53       |
| Duburcq, 2004 (36) M                   | 2004                                | 799            | 39.4                                | 39.0                   | 66                   |          |          |
| Duburcq, 2004 (36) M, MQ               | 2004                                | 100            | 45.0                                | 38.0                   | 13                   |          |          |
| Duburcq, 2004 (36) F                   | 2004                                | 99             | 50.0                                | 38.5                   | 13                   |          |          |
| Dudeck, 2009 (37)                      | 2007                                | 102            | 15.0                                | 31.2                   | 3                    |          | 6        |
| Einarsson, 2009 (41)                   | 2006 <sup>a</sup>                   | 90             | 5.7                                 | 31.0                   | 4                    |          |          |
| Gunter, 2008 (50) M                    | 2005 <sup>a</sup>                   | 264            |                                     | 31.1                   | 27                   |          |          |
| Gunter, 2008 (50) F                    | 2005 <sup>a</sup>                   | 56             | 0.6                                 | 31.1                   | 13                   |          |          |

| First Author, Year<br>(Reference, No.) | Final year<br>of data<br>collection | Sample<br>size | Refusal<br>Rate<br>(%) <sup>b</sup> | Mean<br>Age<br>(years) | Number of PTSD Cases |          |          |
|----------------------------------------|-------------------------------------|----------------|-------------------------------------|------------------------|----------------------|----------|----------|
|                                        |                                     |                |                                     |                        | Point                | One-year | Lifetime |
| Guthrie, 1998 (51)                     | 1998                                | 100            | 46.8                                | 37.9                   | 14                   |          | 30       |
| Hodgins, 1990 (33)                     | 1988                                | 495            | 21.2                                | 31.0                   |                      |          | 64       |
| Huang, 2006 (59)                       | 2004                                | 471            | 0.0                                 | 31.6                   | 50                   |          | 75       |
| Lynch, 2014 (52) sentenced             | 2012                                | 233            |                                     |                        |                      | 73       | 136      |
| Lynch, 2014 (52) remand                | 2012                                | 249            | 22.4                                | 35.0                   |                      | 66       | 120      |
| Math, 2011 (21) sentenced              | 2009                                | 1197           |                                     | 38.0                   | 1                    |          |          |
| Math, 2011 (21) remand                 | 2009                                | 3827           |                                     | 28.4                   | 13                   |          |          |
| Mir, 2015 (40)                         | 2013                                | 150            | 24.2                                | 34.3                   | 39                   |          |          |
| Missoni, 2003 (38)                     | 2000                                | 107            | 2.9                                 | 34.5                   | 4                    |          |          |
| Mohan, 1997 (42)                       | 1993 <sup>a</sup>                   | 45             | 0.0                                 | 25.8                   | 1                    |          |          |
| Mundt, 2013 (58) M                     | 2007                                | 855            |                                     | 32.3                   |                      | 6        |          |
| Mundt, 2013 (58) F                     | 2007                                | 153            | 1.00                                | 34.2                   |                      | 5        |          |
| Mundt, 2016 (35) M                     | 2013                                | 229            |                                     | 30.0                   | 43                   |          |          |
| Mundt, 2016 (35) F                     | 2013                                | 198            | 7.0                                 | 33.5                   | 32                   |          |          |
| Naidoo, 2012 (20) sentenced            | 2009                                | 120            |                                     | 30.5                   | 6                    |          |          |
| Naidoo, 2012 (20) remand               | 2009                                | 73             |                                     | 30.5                   | 13                   |          |          |
| Powell, 1997 (53) sentenced            | 1994 <sup>a</sup>                   | 118            |                                     |                        | 32                   |          |          |
| Powell, 1997 (53) remand               | 1994 <sup>a</sup>                   | 95             | 29.7                                | 32 <sup>c</sup>        | 13                   |          | 69       |
| Simpson, 1999 (44) M,<br>sentenced     | 1998                                | 645            | 22.0                                | 30.6                   | 55                   |          | 124      |
| Simpson, 1999 (44) M,<br>remand        | 1998                                | 441            | 18.3                                | 28.5                   | 42                   |          | 100      |
| Simpson, 1999 (44) F,<br>sentenced     | 1998                                | 162            | 19.0                                | 29.3                   | 27                   |          | 60       |
| Stompe, 2010 (30) sentenced            | 2007 <sup>a</sup>                   | 100            |                                     |                        | 2                    |          |          |
| Stompe, 2010 (30) remand               | 2007 <sup>a</sup>                   | 100            |                                     |                        | 2                    |          |          |
| Teplin, 1996 (54)                      | 2003                                | 1272           | 4.2                                 | 28.0                   | 284                  |          | 426      |
| Trestman, 2007 (55) M                  | 2004 <sup>a</sup>                   | 306            |                                     |                        | 17                   |          | 61       |
| Trestman, 2007 (55) F                  | 2004 <sup>a</sup>                   | 199            | 7.0                                 | 31.6                   | 43                   |          | 83       |
| Tye, 2006 (29)                         | 2000                                | 103            | 22.0                                | 29.6                   |                      | 33       |          |



| First Author, Year<br>(Reference, No.) | Final year<br>of data<br>collection | Sample<br>size | Refusal<br>Rate<br>(%) <sup>b</sup> | Mean<br>Age<br>(years) | Number of PTSD Cases |          |          |
|----------------------------------------|-------------------------------------|----------------|-------------------------------------|------------------------|----------------------|----------|----------|
|                                        |                                     |                |                                     |                        | Point                | One-year | Lifetime |
| Urbaniok, 2007 (47)                    | 2004                                | 25             | 10.7                                |                        | 8 <sup>d</sup>       |          |          |
| Vicens, 2011 (46)                      | 2008                                | 707            | 9.7                                 | 36.8                   | 3                    |          | 25       |
| von Schönfeld, 2006 (39)               | 2003                                | 63             | 29.5                                | 33.9                   | 20                   |          | 29       |
| Zabala-Baños, 2016 (45)                | 2012                                | 184            | 2.3                                 | 39.6                   | 11                   |          | 42       |
| Zlotnick, 1997 (56)                    | 1994 <sup>a</sup>                   | 85             | 25.0                                | 31.0                   | 41                   |          | 58       |

Abbreviations: F, female; M, male; MQ, Martinique; PTSD, post-traumatic stress disorder.

<sup>a</sup> Year of data collection is imputed based on average mean difference between publication year and year of data collection of the other samples.

<sup>b</sup> When refusal rate was not available, non-response rates were used.

<sup>c</sup> Median.

<sup>d</sup> Conservative estimation.

**Web Table 3. Sensitivity Analysis**

|                             | <b>Gender</b> | <b>Quality scoring</b> | <b>Prevalence Rate, % (95% CI)</b> |                      | <b>I-squared, % (95% CI)</b> |
|-----------------------------|---------------|------------------------|------------------------------------|----------------------|------------------------------|
| Point prevalence of PTSD    | Male          | All                    | 6.2                                | (95% CI: 3.9, 9.0)   | 97% (95% CI: 97, 98)         |
|                             |               | High quality           | 5.9                                | (95% CI: 4.0, 8.2)   | 92% (95% CI: 90, 94)         |
|                             | Female        | All                    | 21.1                               | (95% CI: 16.9, 25.6) | 90% (95% CI: 85, 94)         |
|                             |               | High quality           | 18.0                               | (95% CI: 14.2, 22.1) | 87% (95% CI: 77, 92)         |
| One-year prevalence of PTSD | Male          | All                    | 9.9                                | (95% CI: 3.0, 20.2)  | 99% (95% CI: 98, 99)         |
|                             |               | High quality           | 7.6                                | (95% CI: 1.8, 16.9)  | 98% (95% CI: 97, 99)         |
|                             | Female        | All                    | 26.1                               | (95% CI: 15.9, 37.8) | 96% (95% CI: 93, 97)         |
|                             |               | High quality           | 17.7                               | (95% CI: 3.8, 38.6)  | 97% (95% CI: 94, 99)         |
| Lifetime prevalence of PTSD | Male          | All                    | 17.8                               | (95% CI: 12.4, 23.9) | 97% (95% CI: 96, 98)         |
|                             |               | High quality           | 17.3                               | (95% CI: 9.5, 26.8)  | 98% (95% CI: 97, 98)         |
|                             | Female        | All                    | 40.4                               | (95% CI: 31.8, 49.3) | 96% (95% CI: 94, 97)         |
|                             |               | High quality           | 33.1                               | (95% CI: 24.0, 42.8) | 96% (95% CI: 93, 98)         |

Abbreviations: CI, confidence interval; PTSD, post-traumatic stress disorder.

**Web Figure 1.** Funnel Plots of Point Prevalence Estimates Against Standard Errors (for male and female samples), 1980-2017

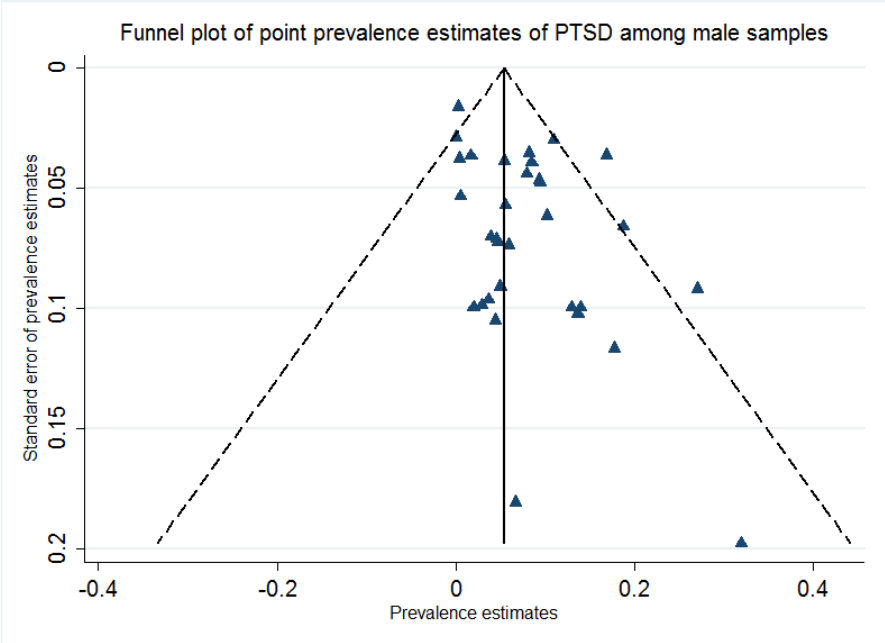

Legend: Egger's test suggested a significant bias in the male samples reporting point prevalence of PTSD ( $bias = 1.047$ ,  $SE(bias) = 0.376$ ;  $P = 0.009$ ). PTSD, post-traumatic stress disorder.

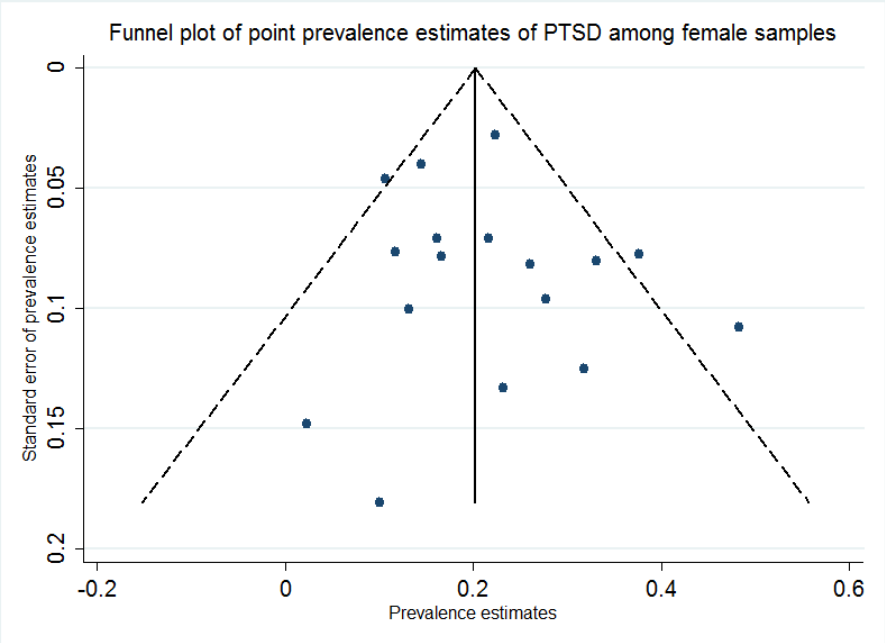

Legend: Egger's test suggested no significant bias in the female samples reporting point prevalence of PTSD ( $bias = 0.486$ ,  $SE(bias) = 0.681$ ;  $P = 0.49$ ). PTSD, post-traumatic stress disorder.

**Web Figure 2.** Funnel Plots of One-year Prevalence Estimates Against Standard Errors (for male and female samples), 1980-2017

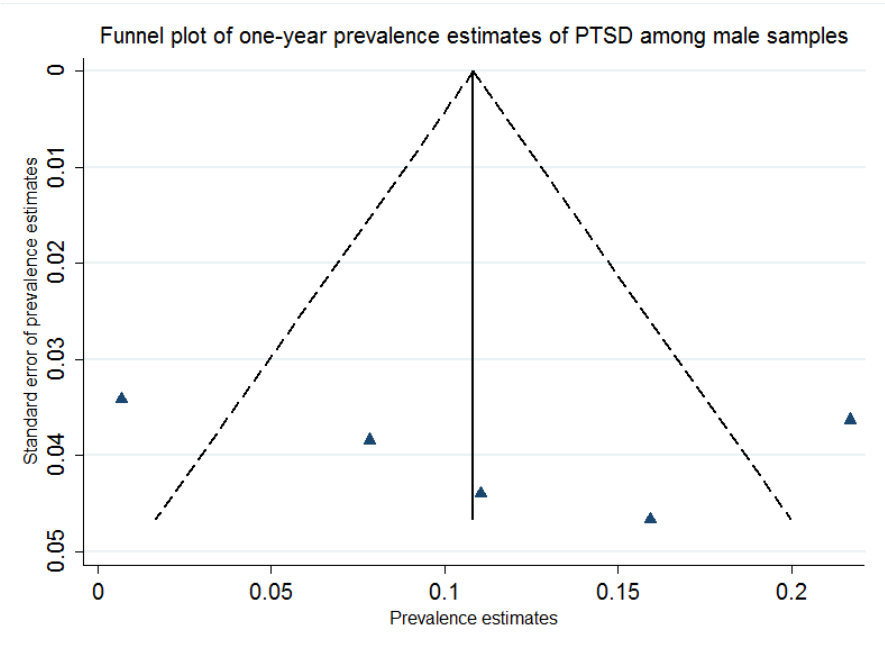

Legend: Egger’s test suggested no significant bias in the male samples reporting one-year prevalence of PTSD ( $bias = 6.072$ ,  $SE(bias) = 9.338$ ;  $P = 0.56$ ). PTSD, post-traumatic stress disorder.

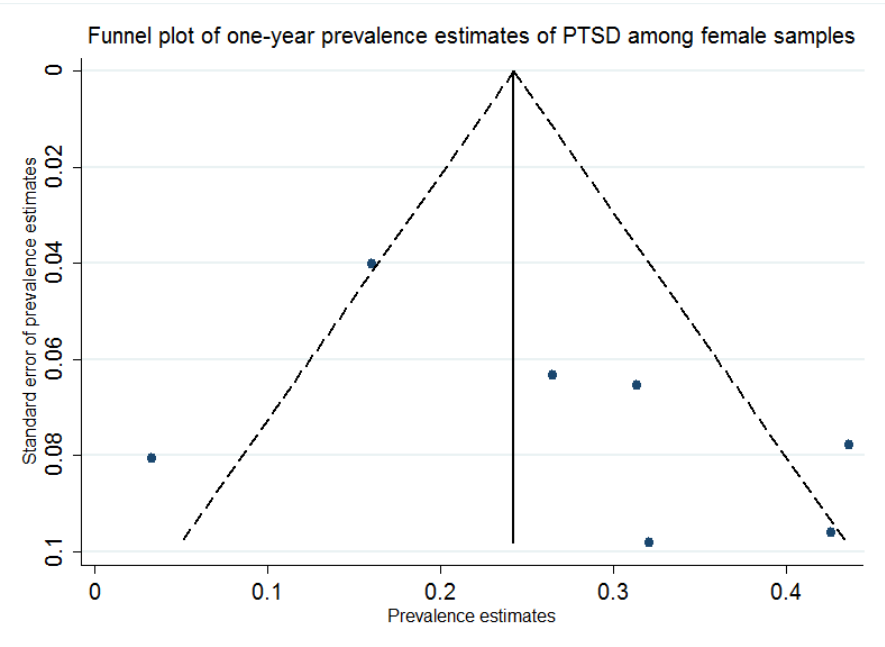

Legend: Egger’s test suggested no significant bias in the female samples reporting one-year prevalence of PTSD ( $bias = 3.127$ ,  $SE(bias) = 2.240$ ;  $P = 0.22$ ). PTSD, post-traumatic stress disorder.

**Web Figure 3.** Funnel Plots of Lifetime Prevalence Estimates Against Standard Errors (for male and female samples), 1980-2017

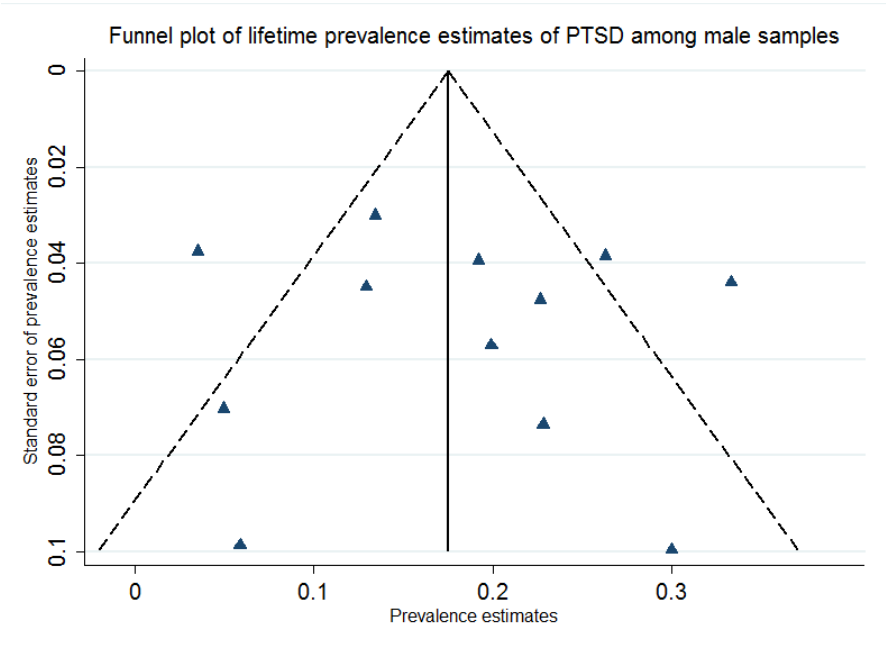

Legend: Egger’s test suggested no significant bias in the male samples reporting lifetime prevalence of PTSD ( $bias = 0.565$ ,  $SE(bias) = 1.840$ ;  $P = 0.78$ ). PTSD, post-traumatic stress disorder.

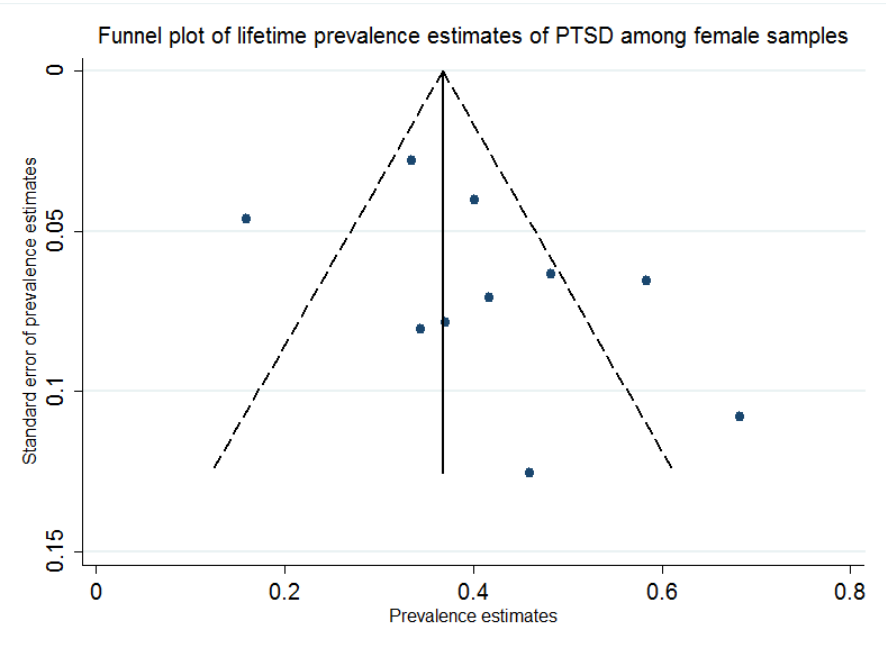

Legend: Egger’s test suggested no significant bias in the female samples reporting lifetime prevalence of PTSD ( $bias = 2.451$ ,  $SE(bias) = 1.580$ ;  $P = 0.16$ ). PTSD, post-traumatic stress disorder.
